# Supplementary material for: Effects of Polydopamine Microspheres Loaded with Silver Nanoparticles on Lolium multiflorum: Bigger Size, Less Toxic
Source: MDPI journal article supplement (doi:10.3390/toxics9070151), 2021-06-29
Supplement: s1 [file s1]

# Supplementary Materials: Effects of Polydopamine Microspheres Loaded with Silver Nanoparticles on *Lolium multiflorum*: Bigger Size, Less Toxic

Xinrui Wang, Hongyong Luo, Weihua Zheng, Xinling Wang, Haijun Xiao and Zhen Zheng

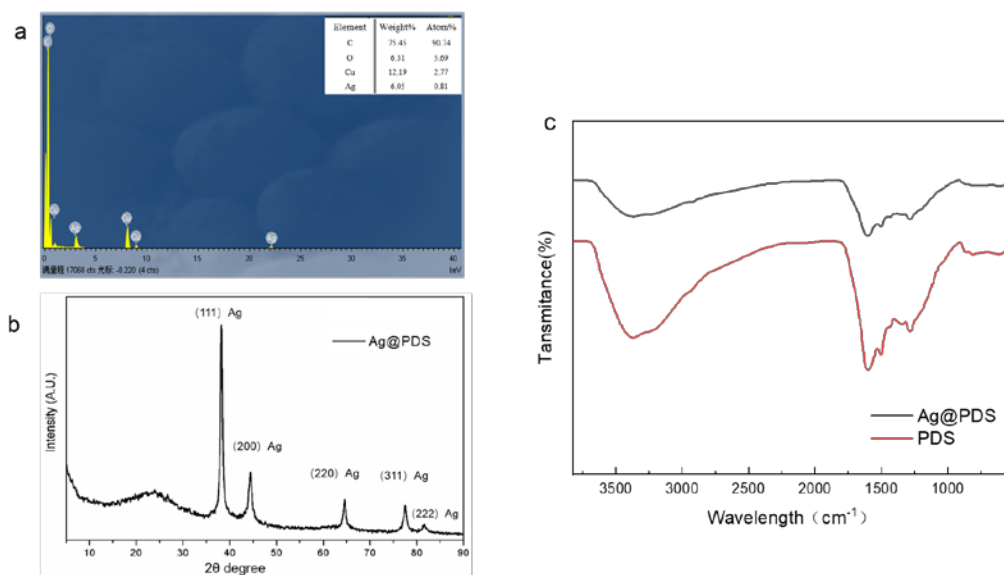

**Figure S1.** The energy dispersive X-ray spectrum (EDX) confirms well the existence of Ag in Ag@PDS (a). The X-ray diffraction (XRD) patterns of the obtained Ag@PDS (b) evidently reveal that silver ions have been reduced to 0 value of metallic. (c) FT-IR spectra of poly-dopamine spheres (PDS) and poly-dopamine spheres loaded with silver nanoparticles (Ag@PDS).

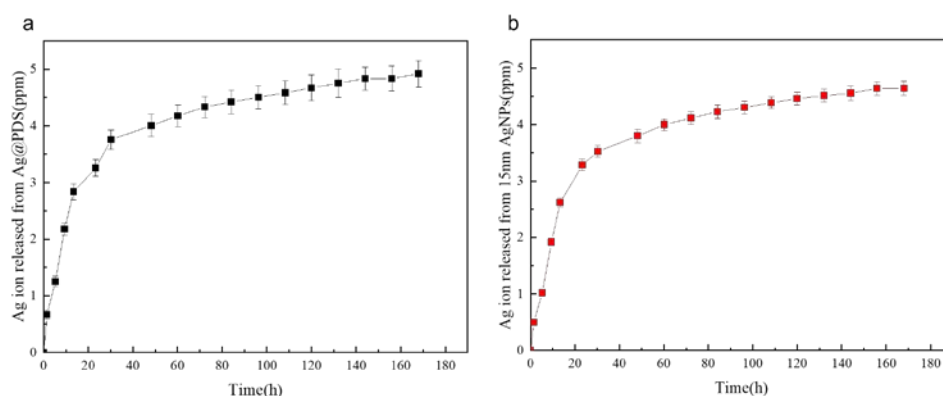

**Figure S2.** The silver ion released from the Ag@PDS and 15nm AgNPs are merely measurable (< 5ppm) during the observation time with the same Ag concentration.

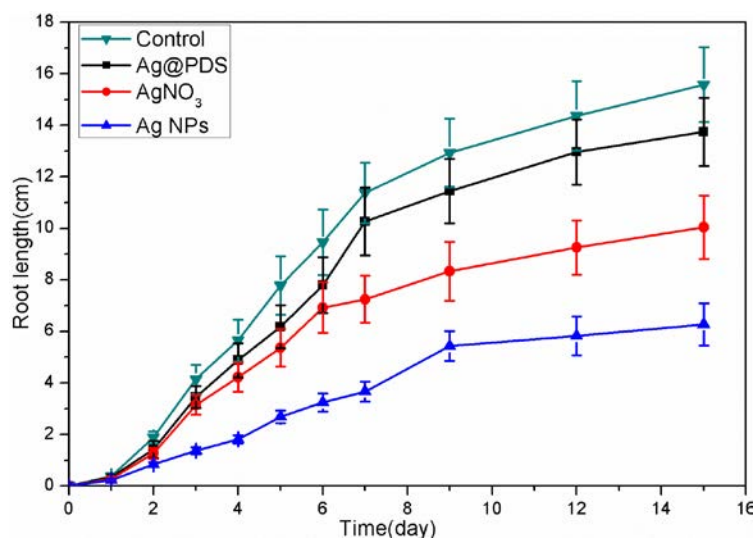

**Figure S3.** Root length of *Lolium multiflorum* after several days exposure of 40mg/L of Ag@PDS, AgNO<sub>3</sub> and Ag NPs.

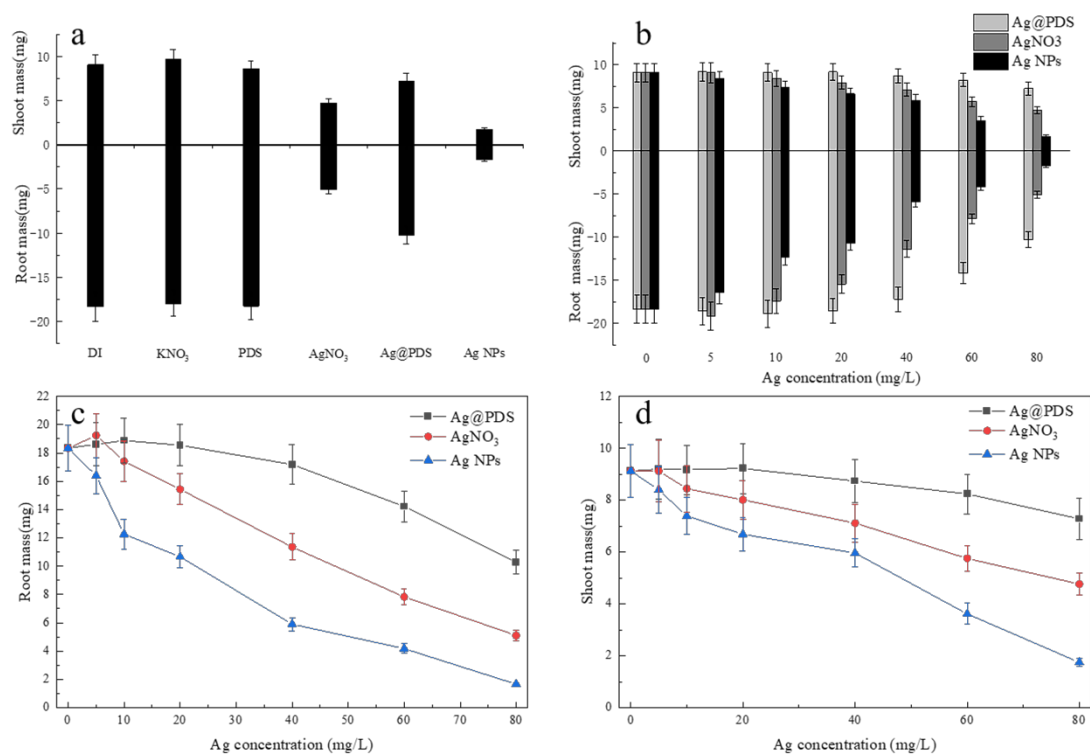

**Figure S4.** Effect of Ag@PDS, AgNO<sub>3</sub> and AgNPs on the *Lolium multiflorum* root (a, c) and shoot (b, d) mass after 7 days exposure ( $p < 0.05$ ).

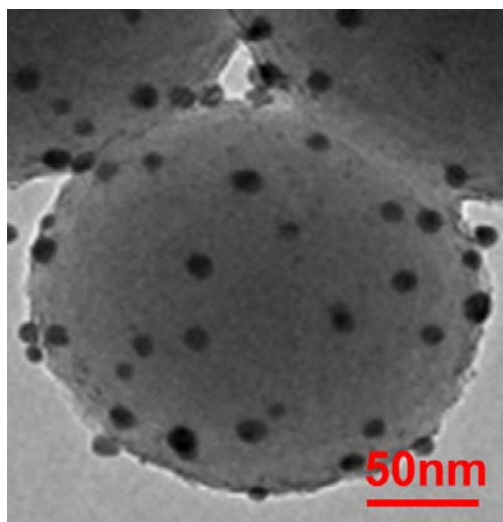

**Figure S5.** TEM images of poly-dopamine spheres loaded with silver nanoparticles (Ag@PDS) with 50 nm scale bar [1].

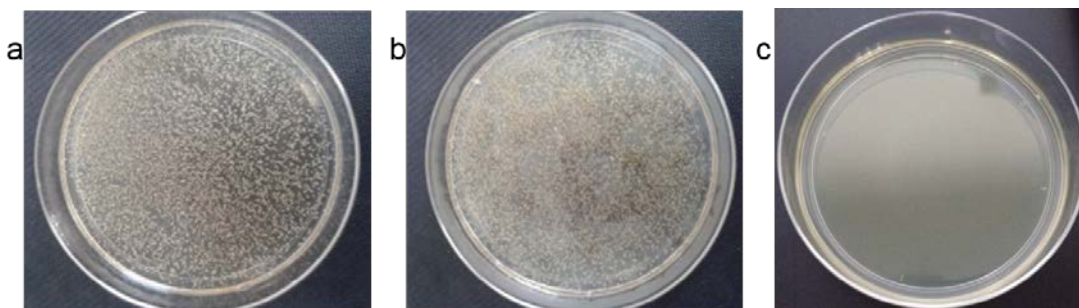

**Figure S6.** Images of LB-agar plates which is used in the antibacterial activity experiment of samples against *E.coli*: (a) control, (b) poly-dopamine (PDS), (c) poly-dopamine sphere loaded with silver nanoparticles (Ag@PDS) [1].

## References

1. Luo, H. Y., Gu, C. W., Zheng, W. H., Dai, F., Wang, X. L., Zheng, Z., **2015**. Facile synthesis of novel size-controlled antibacterial hybrid sphere with silver nanoparticles loaded to poly-dopamine sphere. *RSC Advances*, 5: 13470–13477.
